# Supplementary material for: In Silico before In Vivo: how to Predict the Heating Efficiency of Magnetic Nanoparticles within the Intracellular Space
Source: PubMed Central journal article supplement (PMC5141417; doi:10.1038/srep38733), 2016-12-07
Supplement: srep38733-s1.pdf [file srep38733-s1.pdf]

Electronic Supplementary Information

**Title: *In Silico* before *In Vivo*: how to Predict the Heating Efficiency of Magnetic Nanoparticles within the Intracellular Space**

Beatriz Sanz<sup>a,†</sup>, M. Pilar Calatayud<sup>a,b</sup>, Emilio De Biasi<sup>c</sup>, Enio Lima Jr.<sup>c</sup>, Marcelo Vasquez Mansilla<sup>c</sup>, Roberto D. Zysler<sup>c</sup>, M. Ricardo Ibarra<sup>a,b</sup> and Gerardo F. Goya<sup>a,b,\*</sup>

<sup>a</sup> Instituto de Nanociencia de Aragón (INA), Universidad de Zaragoza, 50018 Zaragoza, Spain

<sup>b</sup> Departamento de Física de la Materia Condensada, Facultad de Ciencias, Universidad de Zaragoza, 50009 Zaragoza, Spain

<sup>c</sup> Centro Atómico Bariloche / CONICET, Bariloche, CP 8400, Argentina

\*Corresponding author

E-mail: [goya@unizar.es](mailto:goya@unizar.es)

---

<sup>†</sup> Currently at *nB nanoScale Biomagnetics S. L., Zaragoza, Spain.*

**Table S1. Saturation magnetization  $M_s$ , coercive field  $H_c$ , average particle core diameter  $\langle d \rangle$ , average hydrodynamic diameter in water  $\langle d_H \rangle_{\text{water}}$ , and in DMEM  $\langle d \rangle_{\text{DMEM}}$ , of the magnetic nanoparticles used in this work.**

| <b>Sample</b>   | <b><math>M_s</math><br/>Am<sup>2</sup>/kg</b> | <b><math>H_c</math><br/>kA/m</b> | <b><math>\langle d \rangle</math><br/>nm</b> | <b><math>\langle d_H \rangle_{\text{water}}</math><br/>nm</b> | <b><math>\langle d_H \rangle_{\text{DMEM}}</math><br/>nm</b> |
|-----------------|-----------------------------------------------|----------------------------------|----------------------------------------------|---------------------------------------------------------------|--------------------------------------------------------------|
| <b>PEI-MNPs</b> | 51.9                                          | 5.6                              | 25±5                                         | 73±25                                                         | 3094±730                                                     |
| <b>PAA-MNPs</b> | 51.6                                          | 5.6                              | 32±6                                         | 155±25                                                        | 1305±381                                                     |

**Table S2. SPA values ( $H_0 = 24$  kA/m,  $f = 560$  kHz) of *as prepared* magnetic nanoparticles in water, protein-rich medium (DMEM) and *in vitro*. Also de values of exponent  $\lambda$  obtained from the fit of the power law  $SPA(H) = \Phi H^\lambda$  are tabulated.**

| Sample          | WATER                          |           | DMEM                           |           | Cells                          |           |
|-----------------|--------------------------------|-----------|--------------------------------|-----------|--------------------------------|-----------|
|                 | SPA<br>(W/g <sub>Fe3O4</sub> ) | $\lambda$ | SPA<br>(W/g <sub>Fe3O4</sub> ) | $\lambda$ | SPA<br>(W/g <sub>Fe3O4</sub> ) | $\lambda$ |
| <b>PEI-MNPs</b> | 274±37                         | 3.6(3)    | 185±16                         | 4.3(3)    | 157±19                         | 4.0(3)    |
| <b>PAA-MNPs</b> | 413±42                         | 4.8(3)    | 378±47                         | 6.2(4)    | 217±12                         | 3.9(3)    |

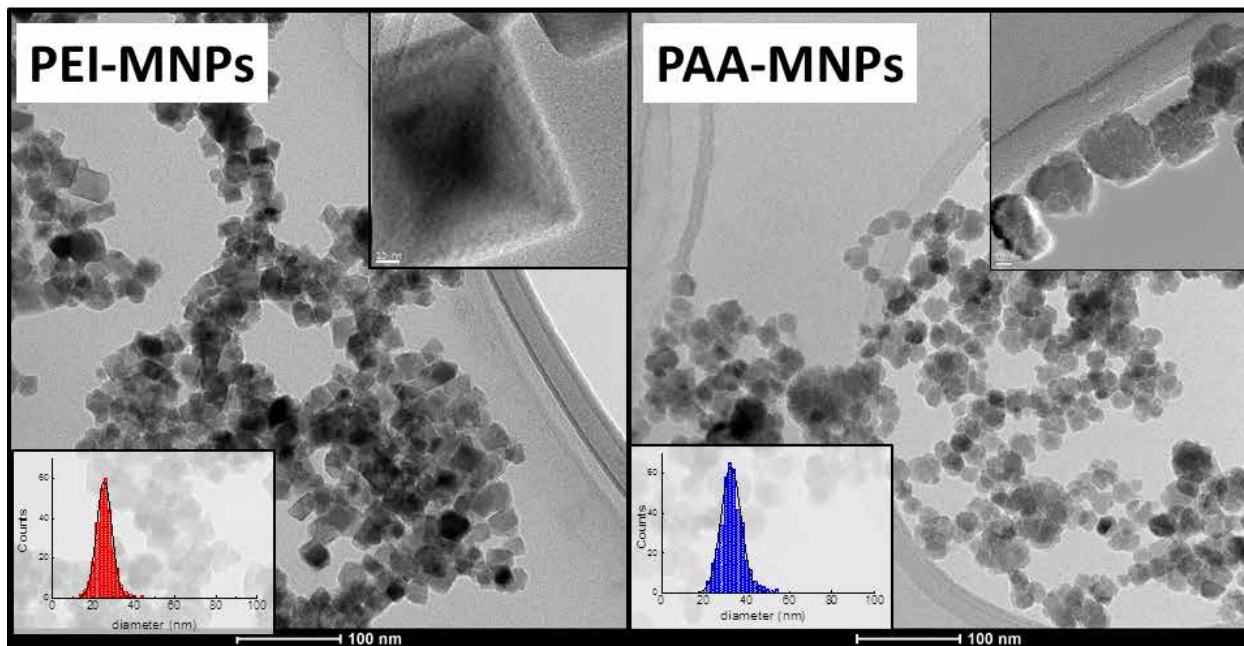

**Figure S1. TEM images of the two magnetic particles used in this work.** Left panel: PEI-MNPs, magnified area and resulting particle size histogram fitted with a Gaussian function. Right panel: PAA-MNPs, magnified area and resulting particle size histogram.

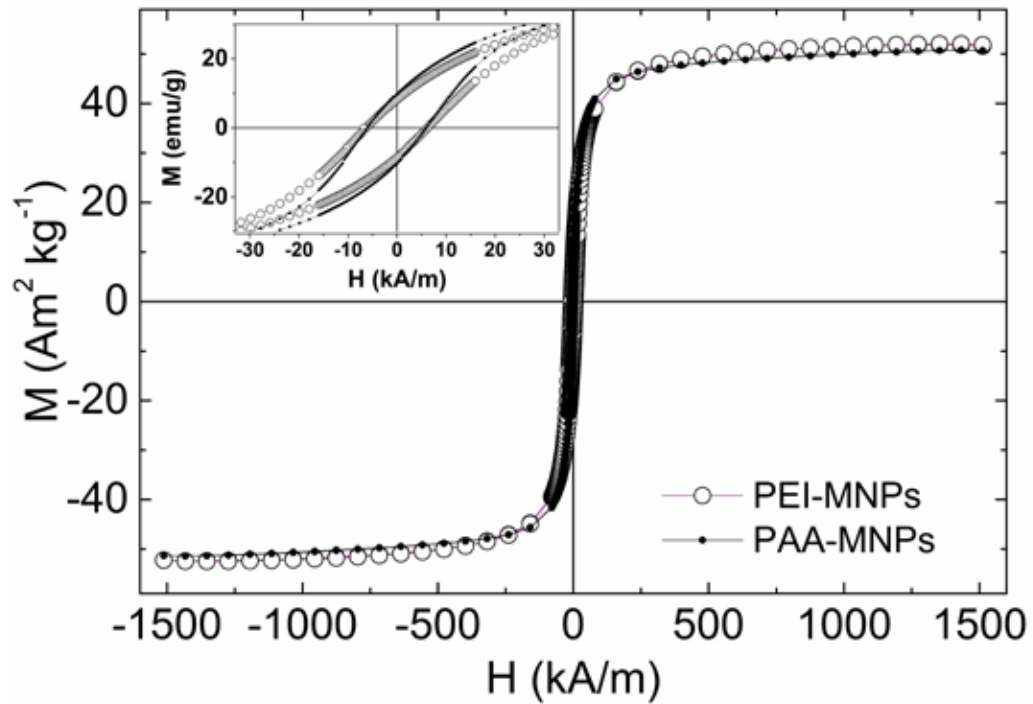

Figure S2. Room-temperature magnetization curves as a function of applied field for poly(ethyleneimine)-coated nanoparticles (open circles) and poly(acrylic acid)-coated nanoparticles (solid circles).

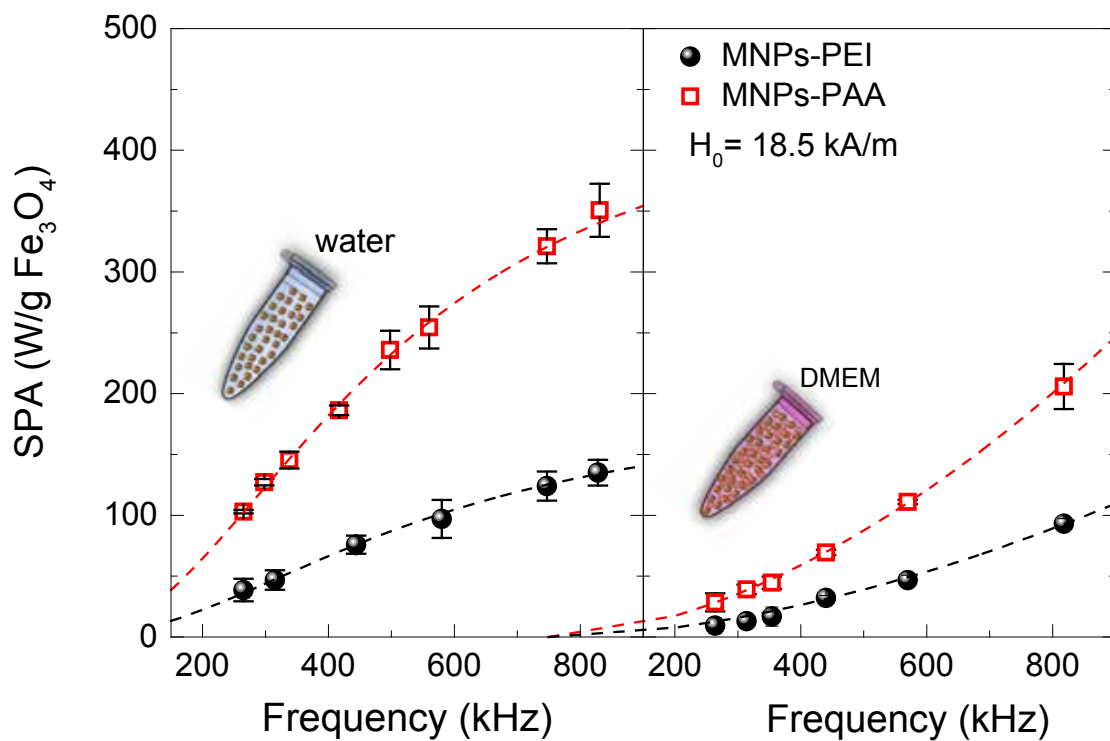

**Figure S3. SPA vs. frequency ( $f$ ) measured at a fixed amplitude  $H_0 = 18.5$  kA/m.**  
 Dashed lines are the best-fit curves determined using the relation  $SPA(f) = A \left( \frac{Bf^2}{1+(Bf)^2} \right)$ .

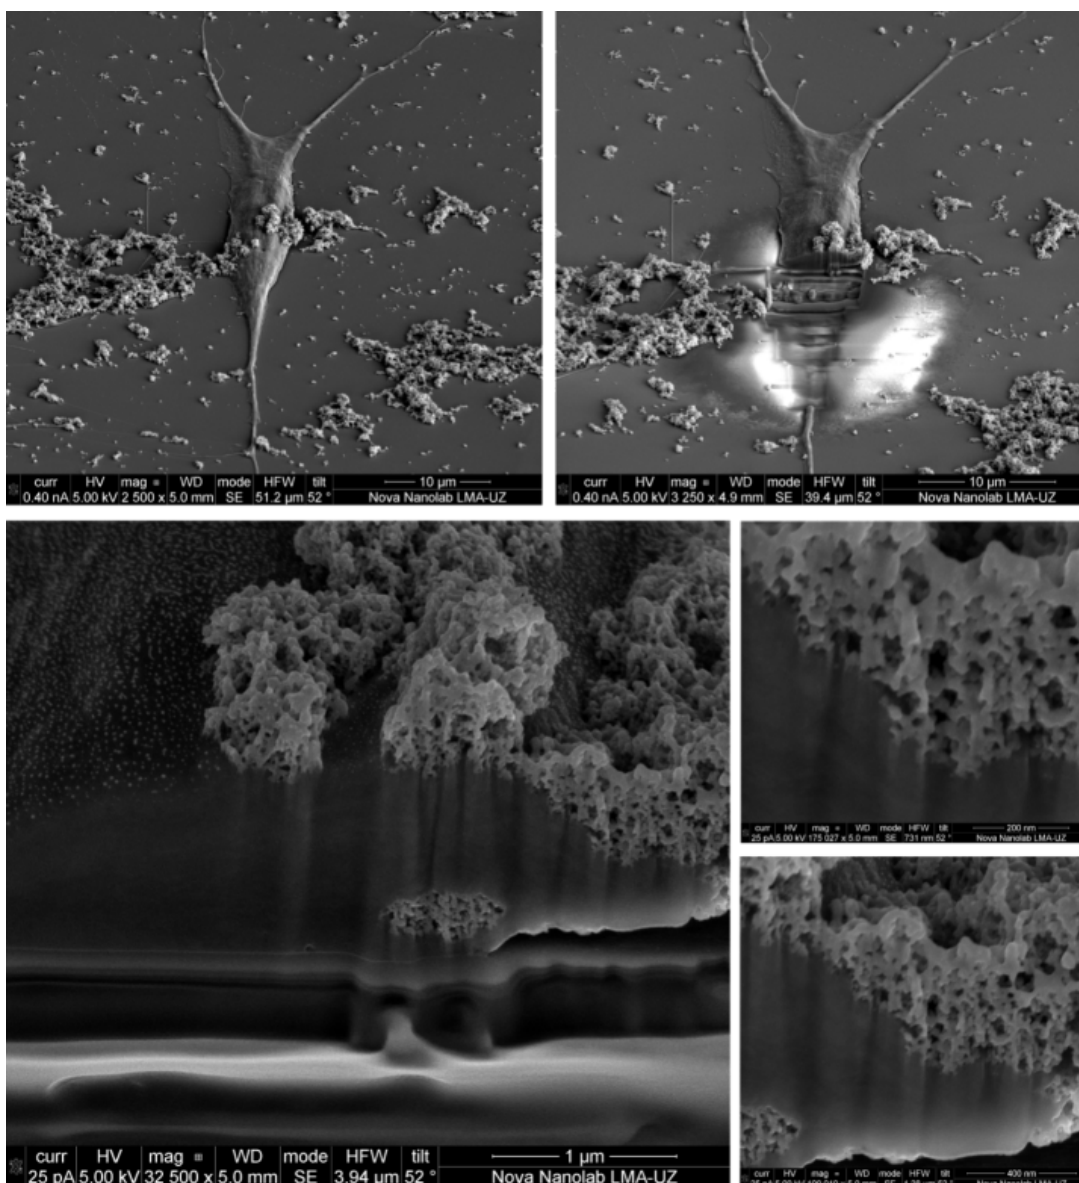

**Figure S4. FIB-SEM Dual Beam images of SH-SY5Y cells incubated with PEI-MNPs ( $100 \mu\text{g}\cdot\text{ml}^{-1}$ ) for 24 hours. Lower panels: cross section images showing a detail of the dense cluster structures observed inside the cells and across the cell membrane.**

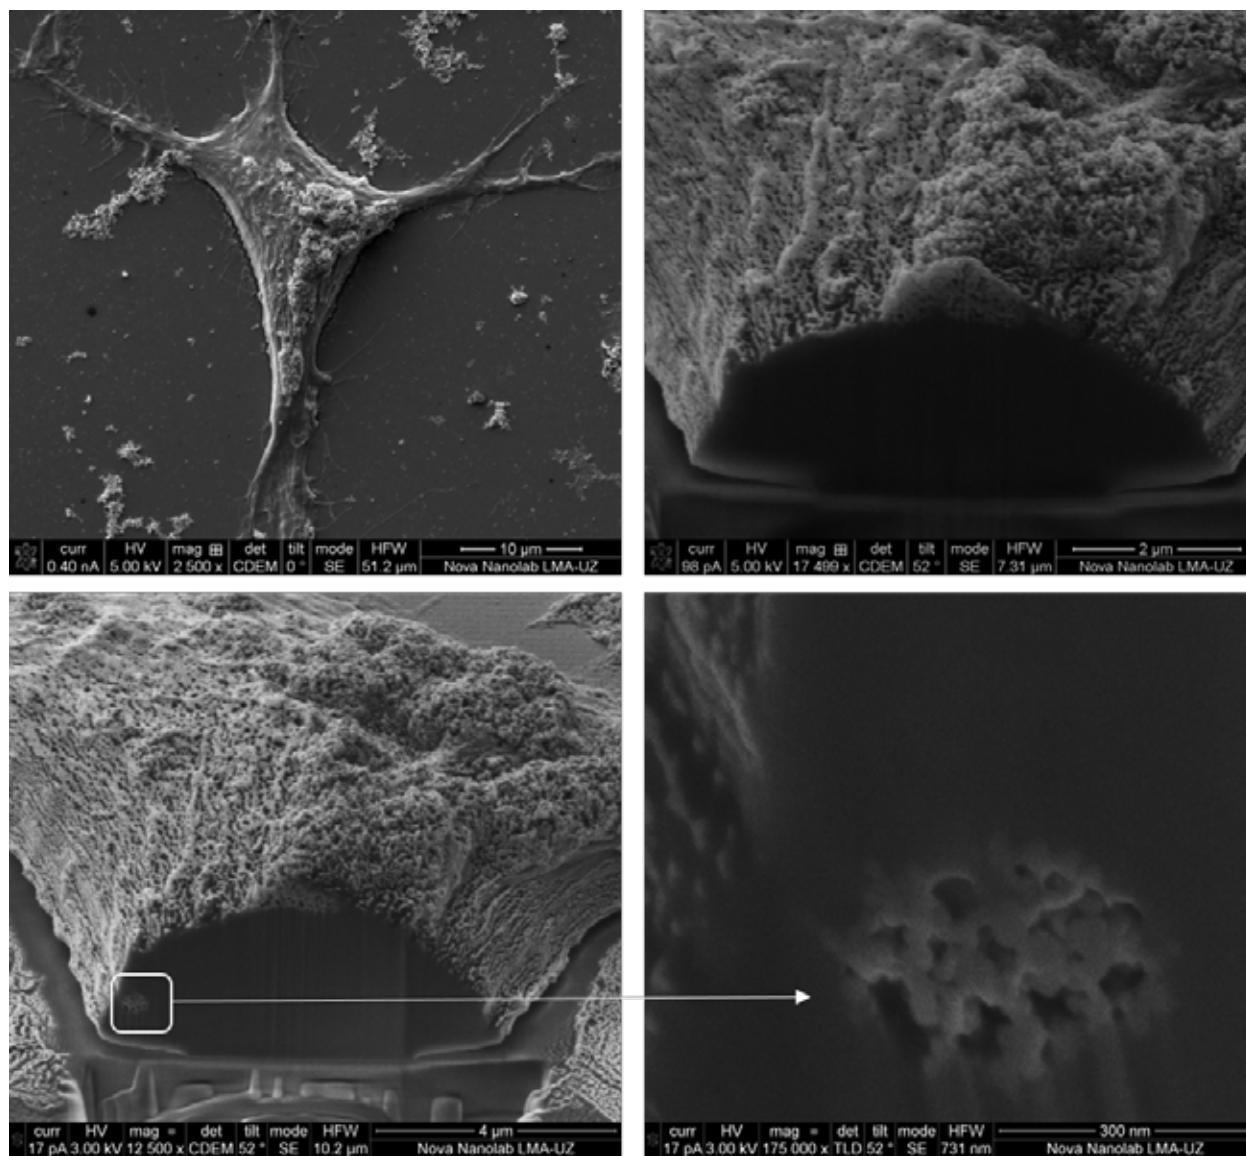

**Figure S5. FIB-SEM images of SH-SY5Y cells incubated with PAA-MNPs ( $100 \mu\text{g}\cdot\text{ml}^{-1}$ ) for 24 hours. The lower panels show a cross-sectioned cell (left) and a magnification of the NPs clusters (right)**



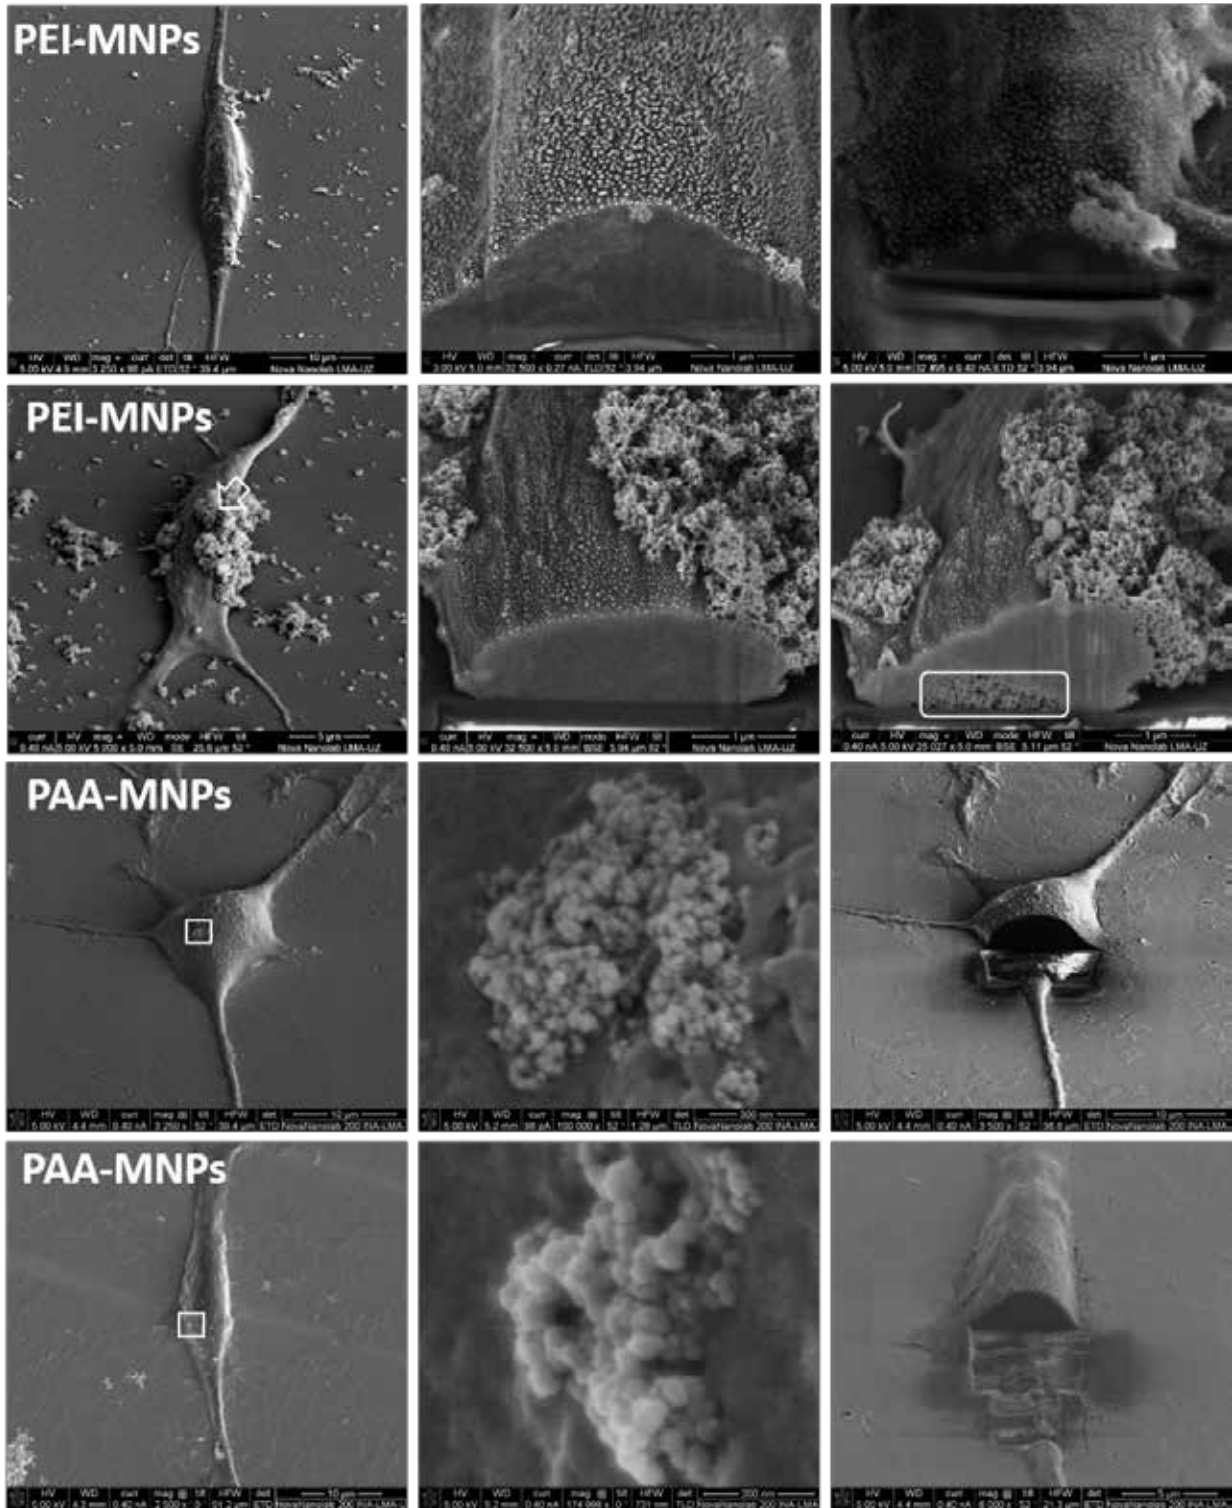

Figure S6. FIB-SEM images of SH-SY5Y cells incubated with PEI-MNPs and PAA-MNPs for 24 hours.
